# Supplementary material
Source: HighWire-hosted journal article supplement (https://www.cmaj.ca/highwire/filestream/79800/field_highwire_adjunct_files/0/202456-res-1-at.pdf)
Supplement: 202456-res-1-at.pdf [file 202456-res-1-at.pdf]

## Appendix 1

Dougan S, Okun N, Bellai-Dussault K, Meng L, Howley H, Huang T, Reszel J, Lanes A, Walker MC, Armour CM. Performance of a universal prenatal screening program incorporating cell-free fetal DNA analysis in Ontario, Canada.

**Table S1:** MMS modalities used by Ontario's publicly funded prenatal screening program for pregnancies with an estimated due date between September 1, 2016 and March 31, 2019.

**Figure S1:** Data Assets of Prenatal Screening Ontario (PSO).

**Figure S2:** Ontario's prenatal screening program offered a variety of screening and diagnostic modalities during the study period.

| MMS Modality                              | Serum Biomarkers                                                          | Ultrasound Biomarker | Screen-positive Cut-off*           |
|-------------------------------------------|---------------------------------------------------------------------------|----------------------|------------------------------------|
| enhanced first trimester screening (eFTS) | First trimester PAPP-A, AFP, hCG, +/- PIGF                                | Nuchal translucency  | ≥ 1/350 for T21<br>≥ 1/200 for T18 |
| First trimester screening (FTS)           | First trimester PAPP-A, hCG                                               | Nuchal translucency  | ≥ 1/350 for T21<br>≥ 1/200 for T18 |
| Integrated prenatal screening (IPS)       | First trimester PAPP-A, hCG/ free β-hCG<br>Second trimester AFP, hCG, UE3 | Nuchal translucency  | ≥ 1/200 for T21<br>≥ 1/200 for T18 |
| Maternal serum screening (MSS)            | Second trimester AFP, hCG, UE3 and inhibin A                              | None                 | ≥ 1/200 for T21<br>≥ 1/200 for T18 |

\*Chance at term that the pregnancy is affected by one or more of the screened conditions based on MMS results.

**Table S1: MMS modalities used by Ontario’s publicly funded prenatal screening program for pregnancies with an estimated due date between September 1, 2016 and March 31, 2019.** MMS: multiple marker screening; PAPP-A: pregnancy-associated plasma protein A; AFP: alpha-fetoprotein; hCG: human chorionic gonadotropin; PIGF: placental growth factor; UE3: unconjugated estriol.

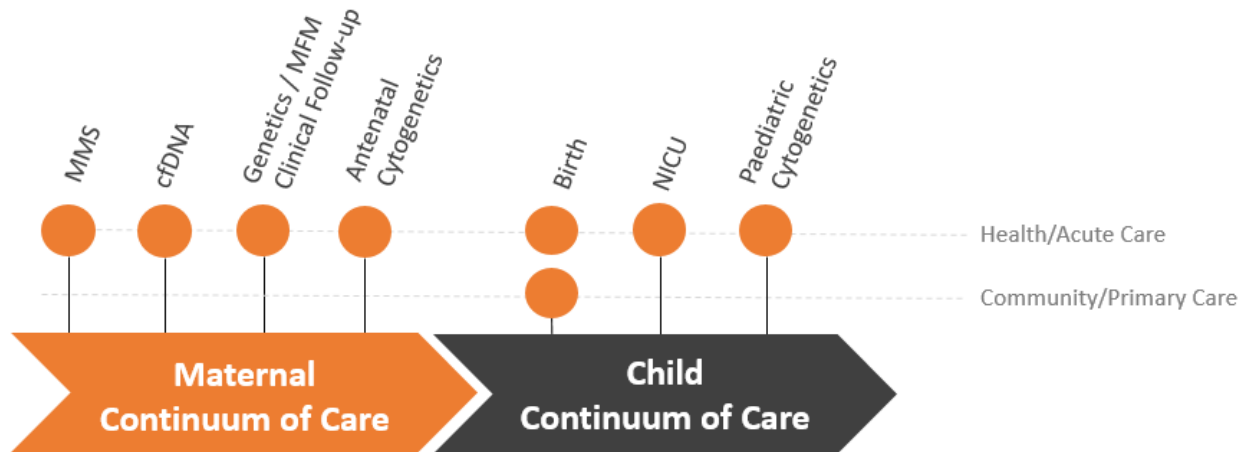

**Figure S1: Data Assets of Prenatal Screening Ontario (PSO).** The Better Outcomes Registry and Network (BORN) Information System contains maternal-child health data for every birth in the province of Ontario – almost 1.5 million babies to date (with 2,088 distinct data variables). PSO uses data from a variety of sources to capture and analyze routinely collected pregnancy and birth data. The figure only includes the subset of BORN Ontario data assets used by PSO. MMS: multiple marker screening; cfDNA: cell-free fetal DNA screening; NICU: neonatal intensive care.

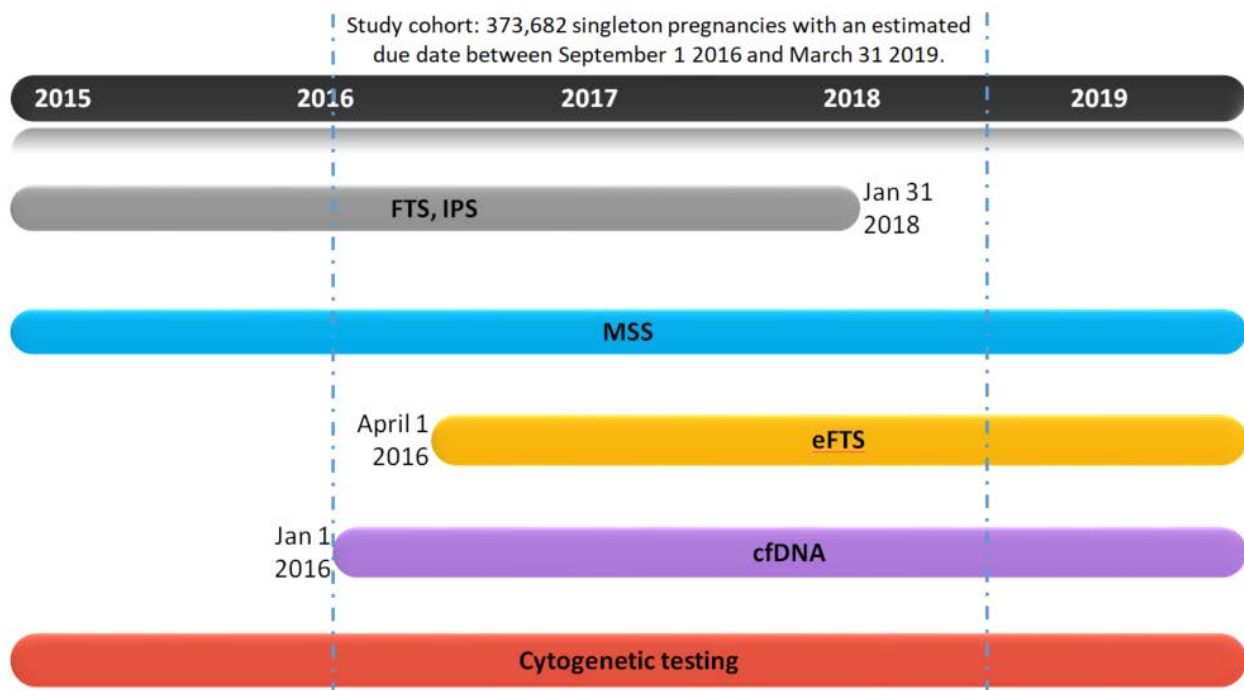

**Figure S2: Ontario’s prenatal screening program offered a variety of screening and diagnostic modalities during the study period.** Coloured bars represent the time period each modality was offered. The start and end of the study period is indicated by vertical dashed lines. FTS: first trimester screening; IPS: integrated prenatal screening; MSS: maternal serum screening; eFTS: enhanced first trimester screening; cfDNA: cell-free fetal DNA screening.
